# Supplementary material
Source: HighWire-hosted journal article supplement (https://www.annfammed.org/highwire/filestream/14756/field_highwire_adjunct_files/0/PetersonSupp.pdf)

**Supplemental materials for**

Peterson LE, Johannides J, Phillips RL. Physicians' choice of board certification activity is unaffected by baseline quality of care: the TRADEMaRQ study. *Ann Fam Med.* 2022;20(2):110-115.

Supplemental Table 1 – Clinical Measures from Each Participation Organization

| NQF # | Measure Title                                                                                                                                                    | KPWA | KPCO | OCHIN | SETMA |
|-------|------------------------------------------------------------------------------------------------------------------------------------------------------------------|------|------|-------|-------|
| 18    | Controlling High Blood Pressure                                                                                                                                  | X    | X    | X     | X     |
| 28    | Smoking Cessation Counseling                                                                                                                                     |      | X    | X     |       |
| 31    | Breast Cancer Screening                                                                                                                                          | X    | X    | X     | X     |
| 32    | Cervical Cancer Screening                                                                                                                                        | X    | X    | X     | X     |
| 34    | Colorectal Cancer Screening                                                                                                                                      | X    | X    | X     | X     |
| 41    | Preventive Care and Screening: Influenza Immunization                                                                                                            |      |      | X     | X     |
| 43    | Pneumonia Vaccination Status for Older Adults                                                                                                                    |      |      | X     | X     |
| 55    | Diabetes: Eye Exam                                                                                                                                               | X    | X    | X     | X     |
| 56    | Diabetes: Foot Exam                                                                                                                                              |      | X    | X     | X     |
| 59    | Diabetes: Hemoglobin A1c Poor Control                                                                                                                            |      | X    | X     | X     |
| 62    | Diabetes: Urine Protein Screening                                                                                                                                | X    |      | X     | X     |
| 64    | Diabetes: Low Density Lipoprotein (LDL) Management                                                                                                               |      |      | X     | X     |
| 68    | Ischemic Vascular Disease (IVD): Use of Aspirin or Another Antithrombotic                                                                                        |      | X    | X     |       |
| 70    | Coronary Artery Disease (CAD): Beta-Blocker Therapy—Prior Myocardial Infarction (MI) or Left Ventricular Systolic Dysfunction (LVEF <40%)                        | X    |      | X     |       |
| 75    | Ischemic Vascular Disease (IVD): Complete Lipid Panel and LDL Control                                                                                            |      | X    | X     |       |
| 81    | Heart Failure (HF): Angiotensin-Converting Enzyme (ACE) Inhibitor or Angiotensin Receptor Blocker (ARB) Therapy for Left Ventricular Systolic Dysfunction (LVSD) | X    | X    | X     |       |
| 83    | Heart Failure (HF): Beta-Blocker Therapy for Left Ventricular Systolic Dysfunction (LVSD)                                                                        |      |      | X     |       |
| 418   | Preventive Care and Screening: Screening for Clinical Depression and Follow-Up Plan                                                                              |      |      | X     |       |
| 419   | Documentation of Current Medications in the Medical Record                                                                                                       |      |      | X     | X     |

Supplemental Table 2 - Number of Family Medicine Certification Activities Completed by Study Participants from 2015 to 2017

|                                                                                        | Overall<br>(n=254) | Test Group<br>(n=130) | Control Group<br>(n=124) | p-value |
|----------------------------------------------------------------------------------------|--------------------|-----------------------|--------------------------|---------|
| No activity completed                                                                  | 50 (19.7%)         | 32 (24.6%)            | 18 (14.5%)               | 0.043   |
| At least one activity completed                                                        | 204 (80.3%)        | 98 (75.4%)            | 106 (85.5%)              |         |
| Median (IQR) number of activities completed for those completing at least one activity | 4 (3-6)            | 4 (2-6)               | 5 (3-6)                  | 0.0023  |

Supplemental Table 3 – Association Between Physician Characteristics and Choosing to Work on Certification Activities with Below Average Quality Measures by Organization, Excluding SETMA

|                                 | Odds Ratio<br>(95% Confidence Interval) | P-value |
|---------------------------------|-----------------------------------------|---------|
| Test Group vs. Control          | 1.33 (0.93, 1.91)                       | 0.12    |
| <u>Personal Characteristics</u> |                                         |         |
| Age (<43.485, N=85)             | ref                                     | 0.94    |
| Age (43.485-54.934, N=85)       | 0.97 (0.62, 1.49)                       |         |
| Age (>54.934)                   | 1.05 (0.67, 1.65)                       |         |
| Male Gender                     | 1.59 (1.11, 2.28)                       | 0.012   |
| MD degree (vs. DO degree)       | 1.09 (0.59, 1.99)                       | 0.79    |
| International Medical Graduate  | 1.46 (0.75, 2.83)                       | 0.26    |
| Score (<=530)                   | Ref                                     | 0.0019  |
| Score (530-620)                 | 0.76 (0.50, 1.16)                       |         |
| Score (>620)                    | 0.43 (0.27, 0.69)                       |         |
| <u>Organization</u>             |                                         |         |
| KPWA                            | Ref                                     |         |
| KPCO                            | 2.12 (1.10, 4.07)                       |         |
| OCHIN                           | 4.56 (2.51, 8.31)                       |         |

Supplemental Figure 1: Mock Up of Expanded Quality Measure Dashboard as Part of the Intervention

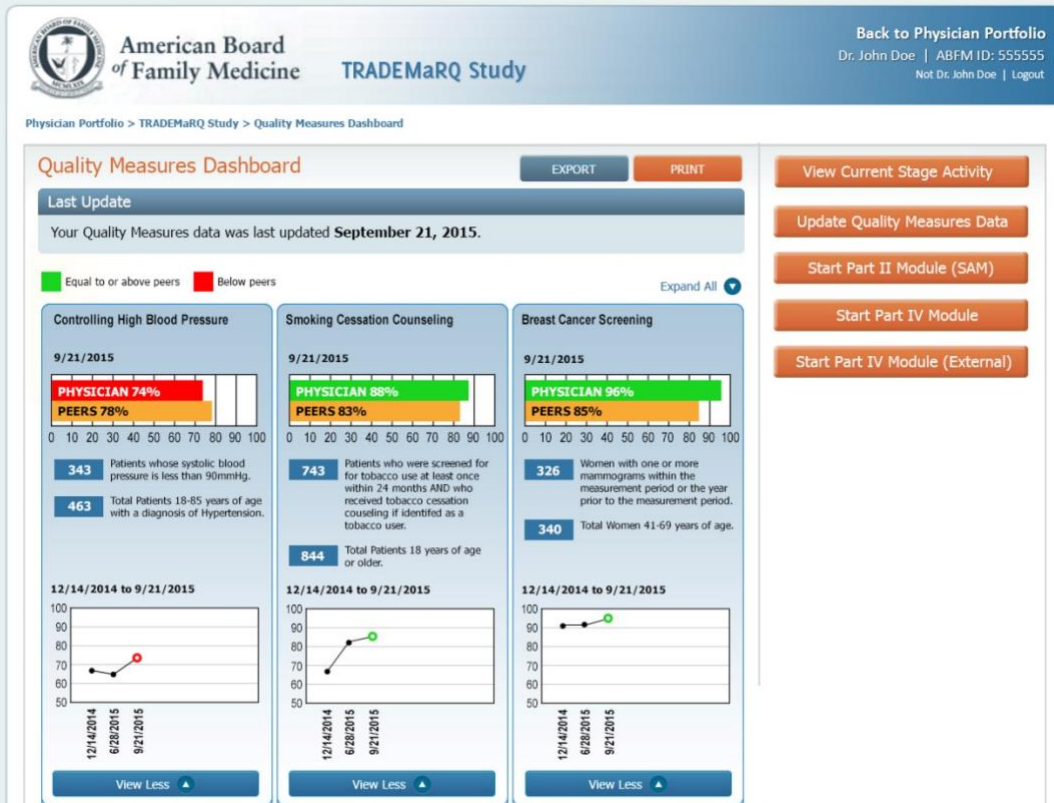

Supplement: PetersonSupp.pdf [file PetersonSupp.pdf]
